# Supplementary material for: Incorporation of aptamers in the terminal loop of shRNAs yields an effective and novel combinatorial targeting strategy
Source: PubMed Central journal article supplement — Nucleic Acids Res. 2017 Oct 25;46(1):e6. doi: 10.1093/nar/gkx980 (PMC5758892; doi:10.1093/nar/gkx980), 2017-10-25
Supplement: gkx980_supp.pdf [file gkx980_supp.pdf]

## Supplementary Data

### Figure Legend

**Supplemental Figure 1.** Purification of HIS-IN and MBP-IN fusion proteins. **A.** Coomassie blue stained gel showing fractions of HIS-IN eluted from Ni-agarose column at 500mM NaCl. When this purified protein was dialyzed against PBS, a substantial amount of protein was precipitated. **B.** Coomassie blue stained gel showing purified MBP-IN fusion before and after digestion by factor X protease. More than half of the IN protein was degraded after the MBP moiety was separated. MBP alone served as positive control.

**Supplemental Figure 2.** Plasmids for functional test of expressed aptamers. In both pJR255 and pJR288, an U6 promoter was used to drive the expression of aptamers, shRNAs or shRNA-aptamer fusions. Oligonucleotide pairs with CACC and AAAA overhangs were cloned to BbsI cut sites. Vectors also contain a Neomycin (G418) resistance cassette and an mCherry visible marker driven by either by CMV (pJR255) or EF1a-HTLV (pJR288) promoters.

**Supplemental Figure 3.** Aptamers expressed directly from U6 promoter lacked any inhibition on lentivirus HIV7-GFP. **A.** FACS data gated with mCherry and GFP signals in control cells (U6) or cells expressing S1R1, S3R3 or S3R3. A single representative experiment is shown. **B.** Quantification of FACS data shown in panel A. Percentages of double positive (Q2) over total GFP positive (Q2+Q3) in cells expressing S1R1, S3R3 or S3R3 were compared to that of empty vector (U6 only) control (100%). Averages and standard deviations of three independent experiments are shown.

**Supplemental Figure 4.** Efficacy of shLuc-aptamer fusions in multiple cycle infection. **A.** Change of virus concentration in cultures measured by P24 assay. Ghost3 cells expressing shLuc-aptamer fusions were infected with Ba-L virus. P24 levels were monitored for 9 days. A representative experiment with triplicate samples is shown. Error bar is not shown because of extensive overlapping. **B.** Inhibition of HIV replication at day 9 post-infection. The averages and standard deviations of two independent assays are shown.

**Supplemental Figure 5. A.** Aptamer S3R3 had higher binding affinity to HIS-IN than the more abundant S1R1. Single gel shift experiment is shown. Unbound aptamers are indicated by lower arrows (S1R1 and S3R3 are 59-nucleotide long while shLuc-S1R1 is 96-nucleotide long). Bound aptamers appeared to form very large complexes with IN and retained in the wells (upper arrow). Signals from lower bands were used to calculate the value of 50% binding. The average of two independent experiments ( $47 \text{ nM} \pm 3$ ) was reported in text. **B.** 50% binding of S3R3 to HIS-IN was determined by a single filter binding assay. A large range of binding affinity (10 and 38nM) was observed for two independent experiments, resulting an average of  $32 \text{ nM} \pm 20$ . Therefore, the result from filter retention binding was not shown in the Result section. The assay was performed essential the same as the one with the population of aptamers (See material and method). Purified S3R3 was labeled with  $^{32}\text{P}$  and incubated with 10, 20, 40, 80 and 160 nM of HIS-IN for 30 min at  $37^\circ\text{C}$ . Aptamer-protein complex were isolated using HAWP filter (0.45 $\mu\text{m}$  pore size, 13mm diameter, EMD Millipore, Concord, MA, USA). After washing with 1ml PBS, radioactivity retained on filter was determined by scintillation counter. Binding affinity was determined using Prism 6 software (GraphPad software Inc.).

# Supplemental Figure 1

## A Purification of HIS-Integrase

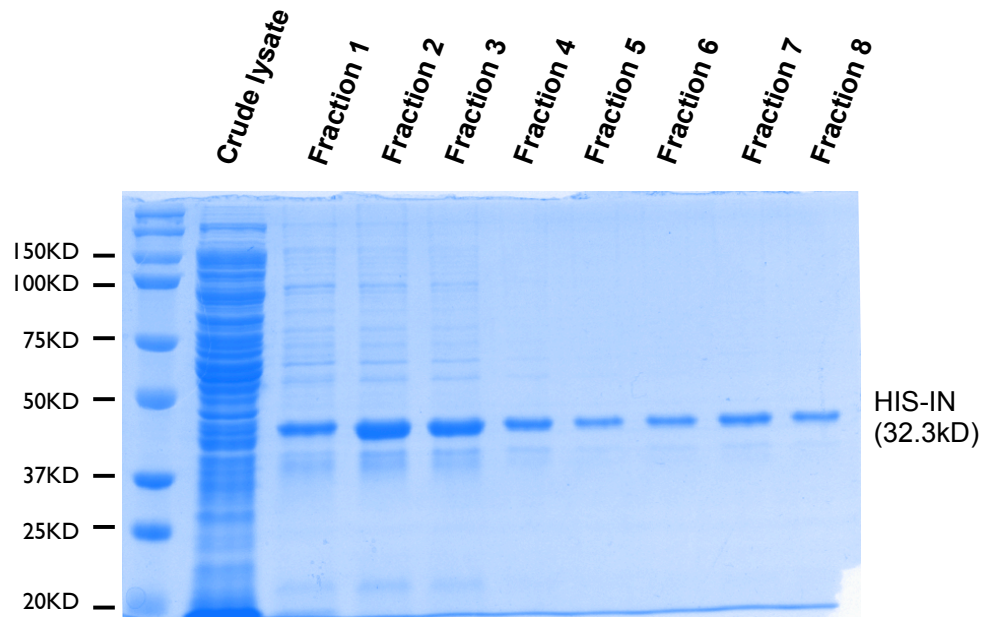

## B Purification of MBP-Integrase

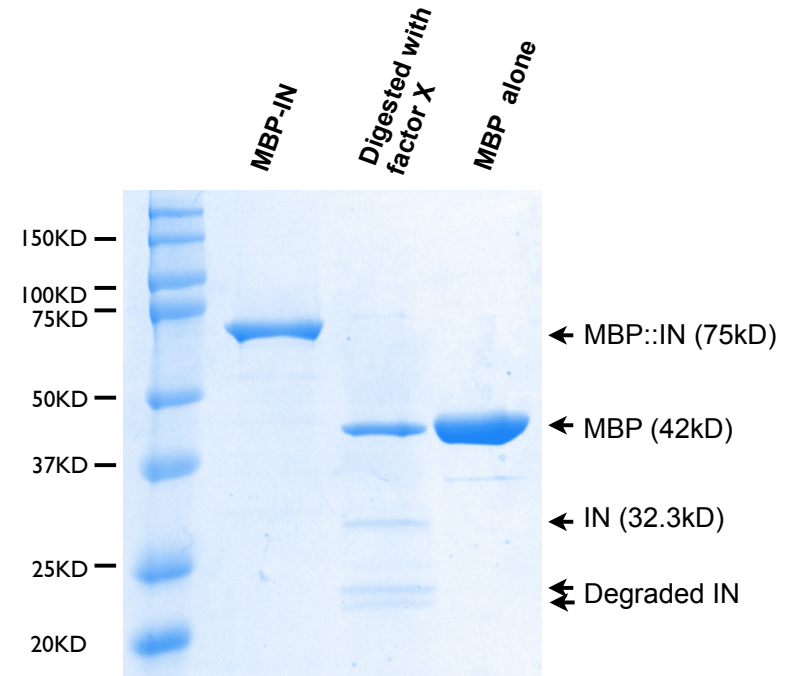

# Supplemental Figure 2

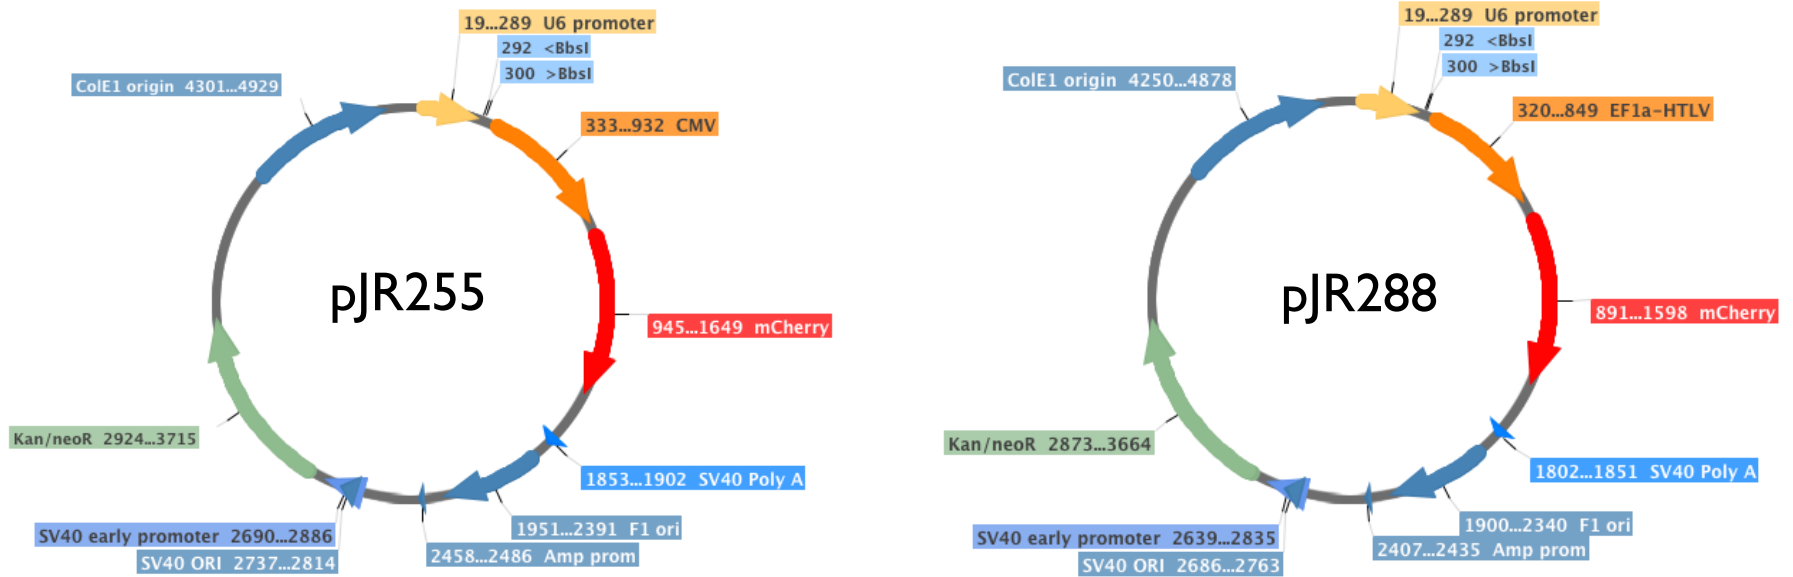

**Bbs-1    Bsb-1**  
 |            |  
**U6 promoter**  
 ATATCTTGTGGAAAGGACGAAA    CACCaaGTCTTCaaGAAGACat    tttttactagtggatcccccggg  
 TATAGAACACCTTTTCCTGCTTTGTGG    ttCAGAAGttCTTCTGtaaaaa    atgatcacctagggggccc

cut with BbsI  
↓

**U6 promoter**            **Insert annealed oligonucleotide pairs with CACC and AAAA overhangs**  
 ATATCTTGTGGAAAGGACGAAA    CACCGNNNNNNNNNNNNNNNNNN.....NNNNNNNNNNNNNNNNNN    tttttactagtggatcccccggg  
 TATAGAACACCTTTTCCTGCTTTGTGG    CNNNNNNNNNNNNNNNNNN.....NNNNNNNNNNNNNNNNNAAAA    atgatcacctagggggccc

# Supplemental Figure 3

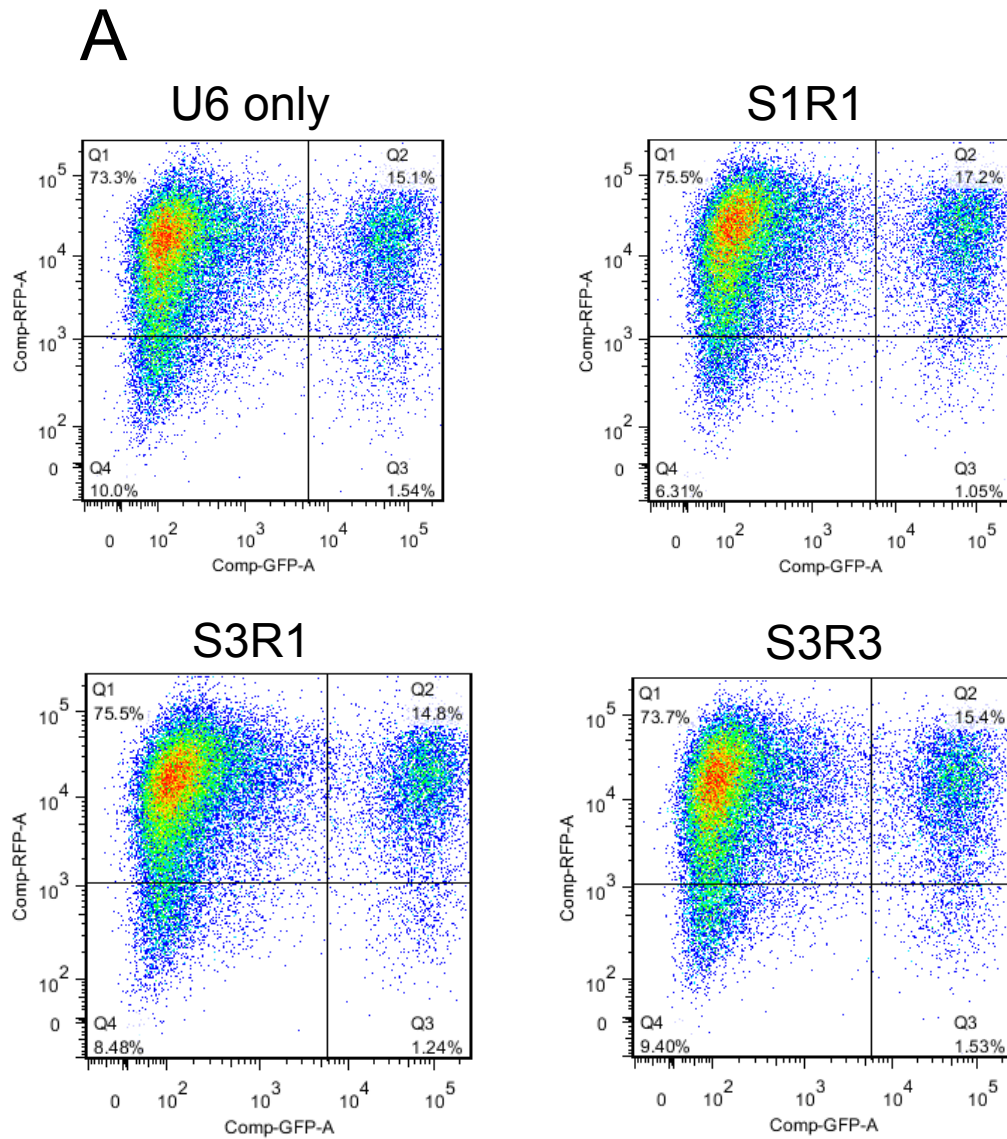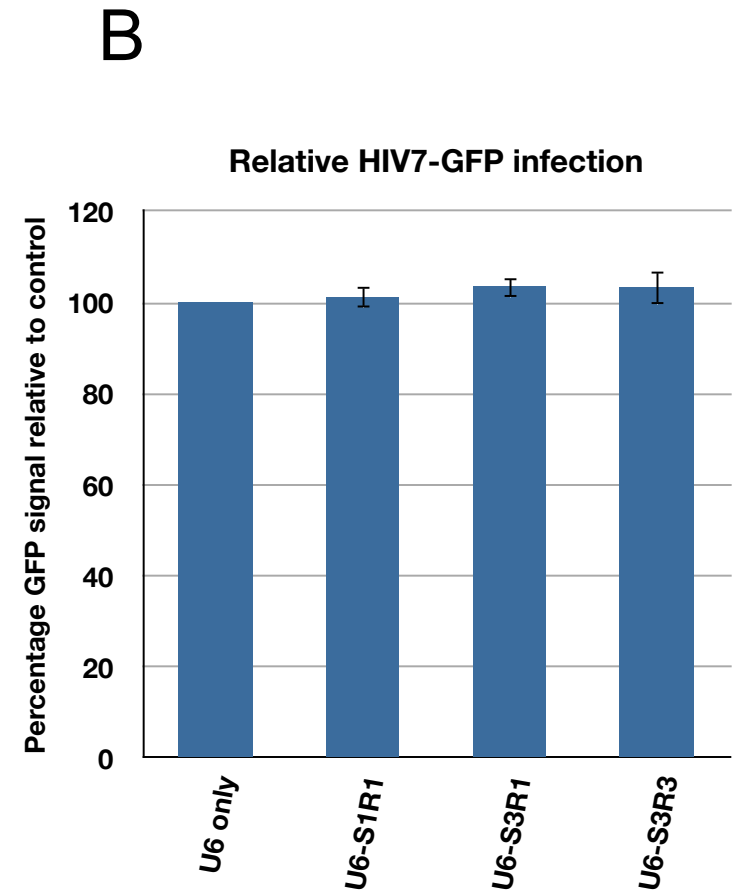

# Supplemental Figure 4

## A

Change in virus concentration

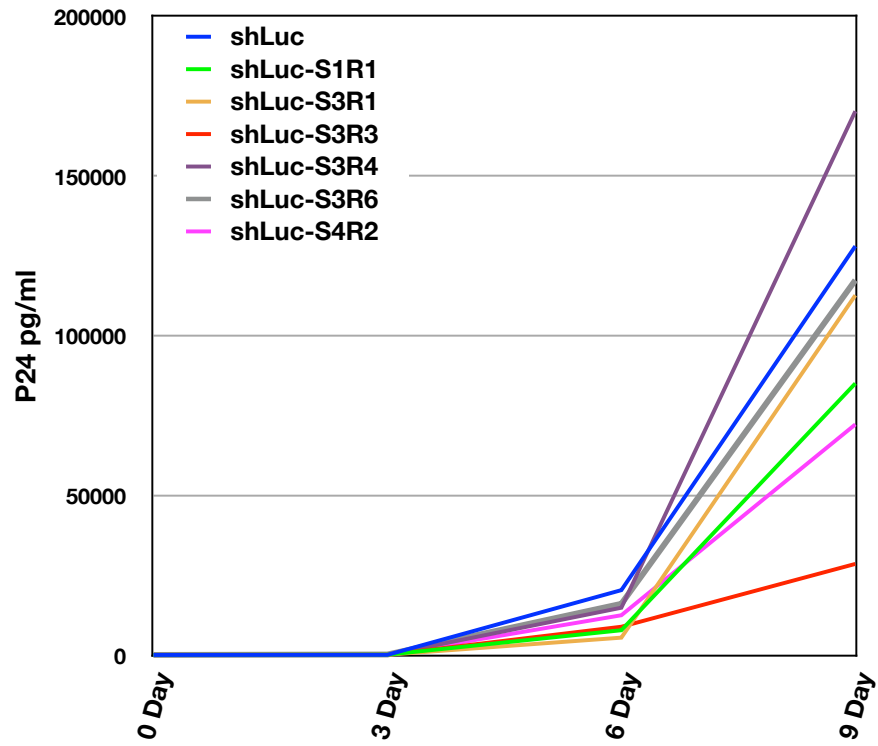

## B

Percentage inhibition at Day 9

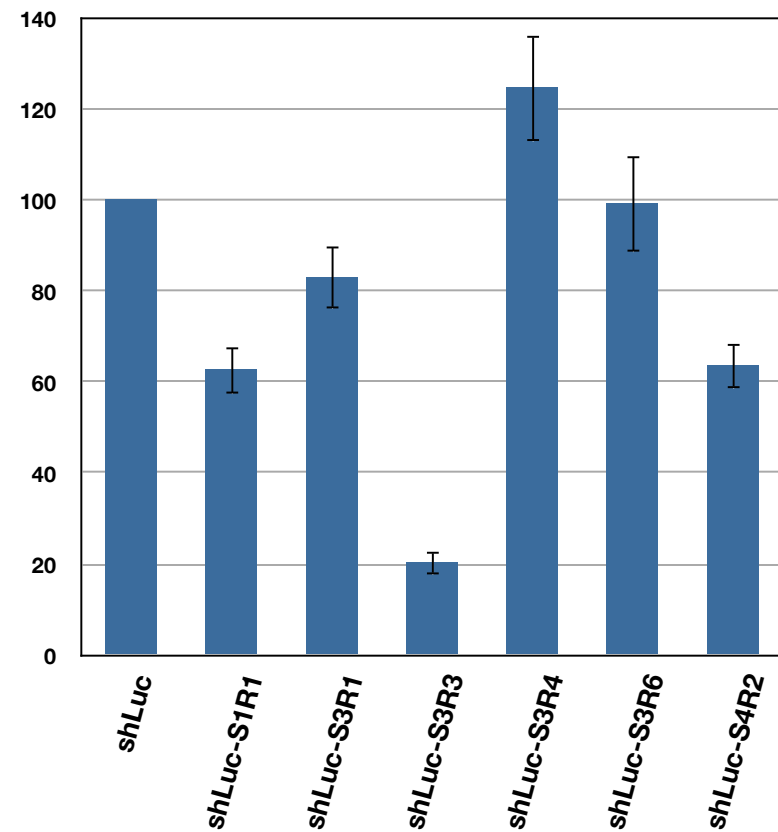

# Supplemental Figure 5A

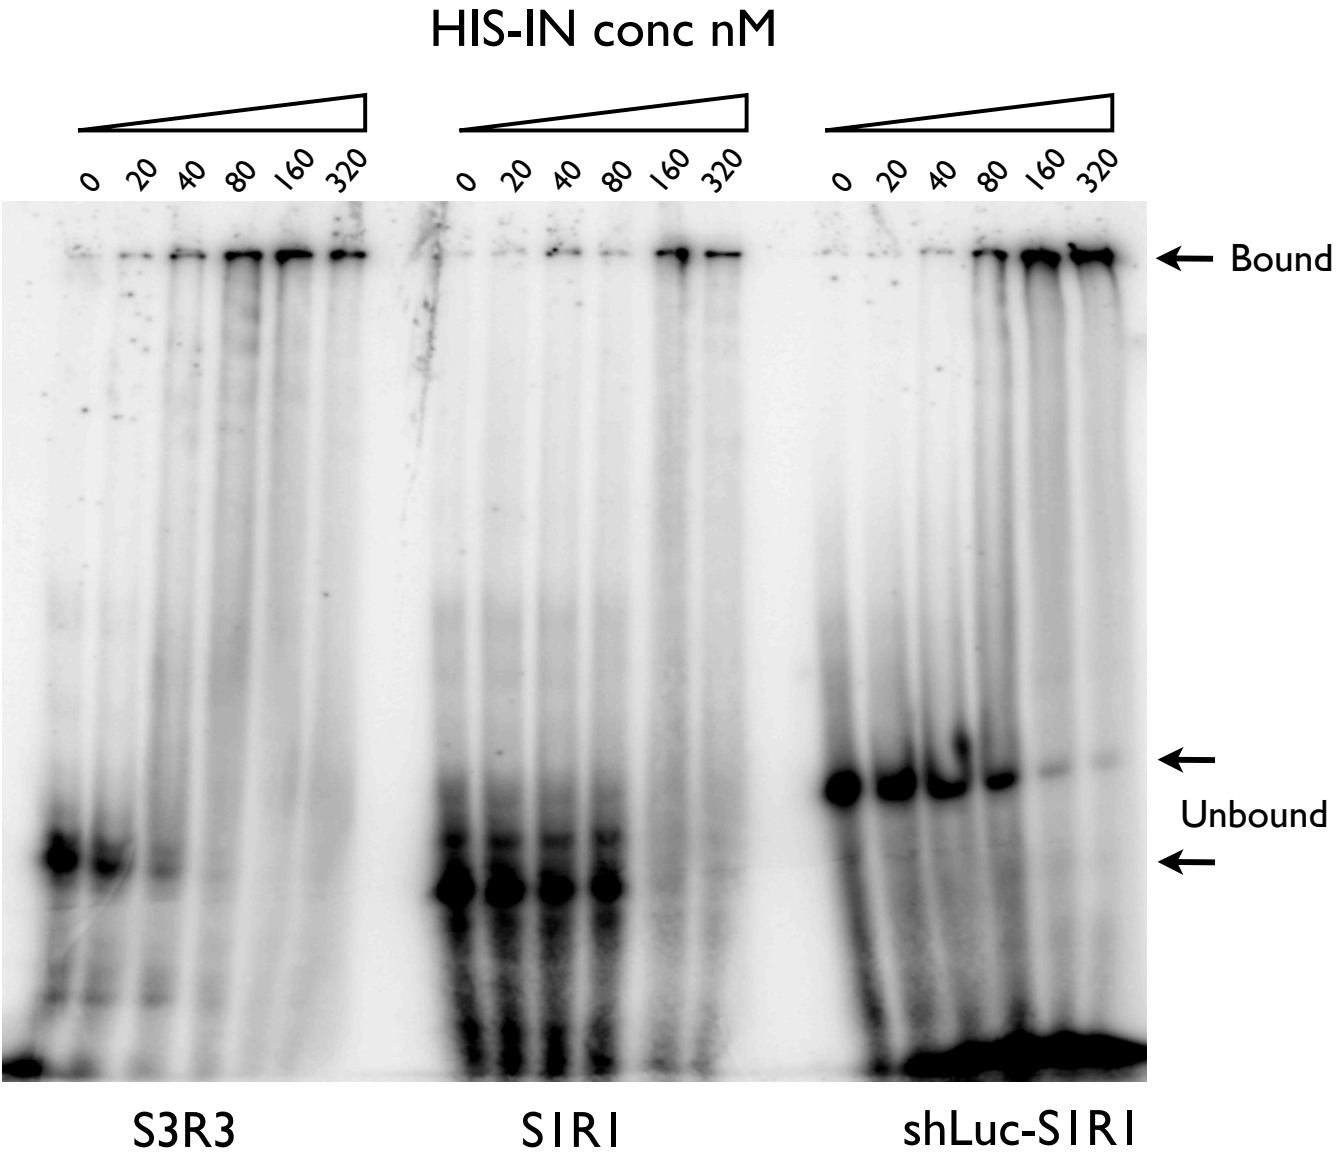

# Supplemental Figure 5B

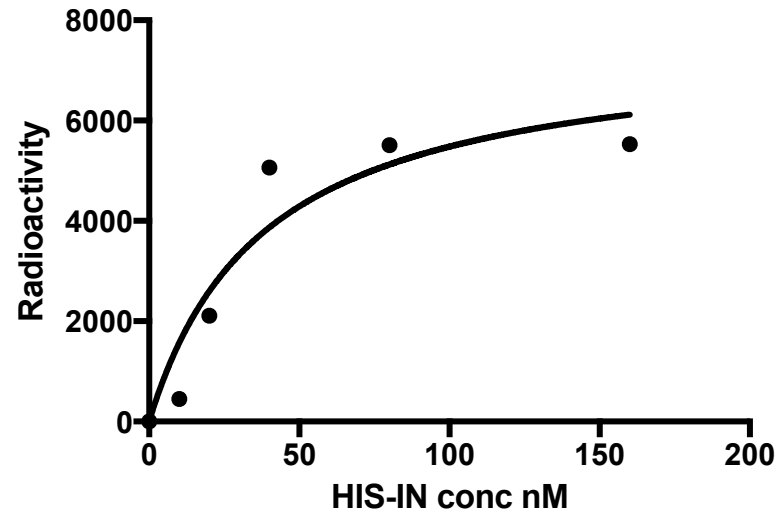

50% binding at 38.5nM





**Suppl. Table1 Oligonucleotides used in study**

|                            |         |                                                                                                                         |
|----------------------------|---------|-------------------------------------------------------------------------------------------------------------------------|
|                            | JRO483  | aaaaCTTACGCTGAGTACTTCGAaCATTTCGCGCCACCGACATCCCAAATAGGACGGTCCCC<br>ATTGGCGCCCCGaTTCGAAGTACTCAGCGTAAGC                    |
| shLuc-S4R2                 | JRO484  | CACCGCTTACGCTGAGTACTTCGAATGGAGGACGATGCGGGCACCTGGCCCCGAAAAATT<br>TCGGGTTGAGCTGGTGGCGCGAGAGGTGGTTCGAAGTACTCAGCGTAAG       |
|                            | JRO485  | AAAATTACGCTGAGTACTTCGAACCACCTCTCGCGCCACCAGCTCAACCCGAAATTTTC<br>GGGGCCAGGTGCCCCGCATCGTCTCCATTTCGAAGTACTCAGCGTAAGC        |
| shS1-S3R3                  | JRO529  | caccGCGGAGACAGCGACGAAGAGCataaGGAGGACGATGCGGGCCGTGATGCTGCGC<br>CATGGGGTGGACTGGGTGGCGCGAqagaGCTCTTCGTCGCTGTCTCCGC         |
|                            | JRO530  | aaaaGCGGAGACAGCGACGAAGAGCtctcTCGCGCCACCCAGTCCACCCCATGGCGCAGCA<br>TACGACGGCCCCGCATCGTCTCttatGCTCTTCGTCGCTGTCTCCGC        |
| RT 70.15                   | JRO 566 | caccAAAGACGCAGACCTACGAACCCAGGAGATAAGGGGGAAAACTCTGGAAAACCA                                                               |
|                            | JRO 567 | aaaaTGGTTTTCCAGAGTTTTCCCCCTTATCTCTGGGTTCTAGGTCTGCGTCTTT                                                                 |
| shLuc-70.15                | JRO568  | caccGCTTACGCTGAGTACTTCGAAAAAGACGCAGACCTACGAACCCAGGAGATAAGGGGG<br>AAAACCTCTGGAAAACCAT                                    |
|                            | JRO569  | CTTACGCTGAGTACTTCGAAtggttttccAGAGttttccCCcttatCTCctGGGTtctgtagtctgctctt<br>TTCGAAGTACTCAGCGTAAGC                        |
| <b>For mobility assay</b>  |         |                                                                                                                         |
| T7-S1R1                    | JRO469  | TAATACGACTCACTATAGGGAGGACGATGCGGGCCGTATGGGTGAGCCCGTTAAGATTGC<br>GCGTGGTGGCGCGAGAGG                                      |
|                            | JRO493  | CCTCTCGCGCCACCACGCGCAATCTTAACGGGCTCACCCATACGGCccgcatcgtcctccctata<br>gtgagtcgtatta                                      |
| T7-shLuc-S1R1              | JRO512  | taatacgactcactataggGCTTACGCTGAGTACTTCGAaAtATGCGGGCCGTATGGGTGAGCCC<br>GTTAAGATTGCGCGTGGTGGCGCGAGAGgTTTCGAAGTACTCAGCGTAAG |
|                            | JRO514  | CTTACGCTGAGTACTTCGAAACCTCTCGCGCCACCACGCGCAATCTTAACGGGCTCACCCA<br>TACGGCCCCGCATATTCGAAGTACTCAGCGTAAGCCCTATAGTGAGTCGTATTA |
| T7-S3R3                    | JRO527  | TAATACGACTCACTATAGGgaggacgatcgggccgtatgctgcgccatggggtgactgggtgcgc<br>gagagag                                            |
|                            | JRO528  | ctctctcgcgccaccagtcaccatggcgagcatacgacggcccgcctcctCCTATAGTGAGTCGT<br>ATTA                                               |
| <b>Probes for northern</b> |         |                                                                                                                         |
| Luciferse probe            | JRO541  | CTTACGCTGAGTACTTCGAAAT                                                                                                  |
| S1R1 probe                 | JRO456  | TCTTAACGGGCTCACCCATA                                                                                                    |
